# Supplementary material
Source: PubMed Central journal article supplement (PMC5155637)
Supplement: NIHMS791584-supplement-supplement_1.pdf [file NIHMS791584-supplement-supplement_1.pdf]

## CLASSIFICATION OF DIAGNOSIS

### A. Cardiovascular system

1. Congestive heart failure ( systolic, diastolic)
2. myocardial infarction ( ST elevation and non- ST elevation)
3. Chest pain/ angina ( stable, unstable)
4. Valvular abnormalities
  - Aortic valve stenosis
  - Aortic valve regurgitation ( insufficiency)
  - Mitral valve stenosis
  - Mitral valve regurgitation ( insufficiency)
  - Tricuspid valve regurgitation ( insufficiency)
  - Pulmonary valve abnormalities
5. Hypertension
  - Urgency/emergency
6. Volume fluid overload
7. Hypotension
8. Ventricular tachycardia
9. Bradycardia
10. Atrial fibrillation/flutter
11. Supraventricular tachycardia
12. Syncope
13. Pericarditis

14. Peripheral vascular disease
15. AAA ( aortic abdominal aneurism)
16. Cardio-pulmonary arrest

## B. Respiratory system

1. Acute respiratory failure ( hypoxic or hypercapnic)
2. COPD / COPD exacerbation
3. Pleural effusion
4. Pneumothorax
5. Hypoxemia
6. Pulmonary embolism
7. Empyema

## C. Infections

1. Soft tissue infections ( cellulitis)
2. Joint infections
3. Bone infection
4. Pneumonia
5. Bronchitis
6. Enteritis/colitis
7. Perirectal abscess
8. Urinary tract infection
9. SIRS/Sepsis

10. Fever
11. Abscess
12. Pharyngitis
13. Cholecystitis
14. Bacteremia

#### D. Central nervous system

1. Encephalopathy
2. Stroke
3. Vertigo
4. Weakness
5. Headache
6. Transitional ischemic attack
7. Intracranial hemorrhages
8. Seizures

#### E. Genitourinary tract

1. Acute kidney Injury ( AKI)
2. Acute worsening of chronic kidney function
3. Hypokalemia
4. Hyperkalemia
5. Hyponatremia
6. Hypernatremia

7. Hypocalcaemia
8. Hypercalcemia
9. Nephrolithiasis/obstruction
10. Nephrotic syndrome
11. Volume depletion
12. Urinary retention

#### F. Gastrointestinal tract

1. Gastrointestinal tract bleeding
2. Gastritis/Duodenitis
3. GERD
4. Cirrhosis
5. Diverticulitis
6. Peptic ulcer disease
7. Small bowel obstruction
8. Esophagitis
9. Ischemic colitis
10. Nausea/Vomiting
11. Pancreatitis
12. Biliary colic/biliary stone/biliary duct stone
13. Abdominal pain
14. Anal abnormalities
15. Diarrhea

## G. Hematology –oncology system

1. Anemia
2. Deep venous thrombosis
3. Malignancy
4. Non-gastrointestinal bleeding
5. Hematological malignancies

## H. Musculoskeletal

1. Hemarthrosis
2. Arthritis
3. Joint pain/postoperative pain
4. Edema of lower extremities
5. Strain/sprain
6. Gout
7. Limb wound
8. Back pain

## I. Miscellaneous

1. Non-cardiac chest pain
2. Skin abrasion/toe nail avulsion
3. Anxiety
4. Eye pathology

## J. Diabetes and metabolism

1. Hyperglycemia
2. Hypoglycemia
3. Diabetic ketoacidosis
4. Diabetes mellitus

## K. Death

## L. Dialysis

1. Initiation of renal replacement therapy
2. AV fistula placement / surgery
3. AV graft

**Table 2. Number of Hospitalizations and Elixhauser comorbidity measures for CKD/MIT participants**

|                                      |            | Mean     | Standard Deviation        |
|--------------------------------------|------------|----------|---------------------------|
| <b>Number of Hospitalizations</b>    |            | 2.03     | 1.56                      |
| <b>Count of comorbidities</b>        |            | 4.65     | 2.48                      |
| <b>Comorbidities</b>                 | <b>n/N</b> | <b>%</b> | <b>Standard Deviation</b> |
| <b>Congestive heart failure</b>      | 43/155     | 28%      | 0.45                      |
| <b>Valvular disease</b>              | 26/155     | 17%      | 0.38                      |
| <b>Pulmonary circulation</b>         | 21/155     | 14%      | 0.34                      |
| <b>Peripheral vascular disorders</b> | 23/155     | 15%      | 0.36                      |
| <b>Hypertension, uncomplicated</b>   | 22/155     | 14%      | 0.35                      |
| <b>Hypertension, complicated</b>     | 99/155     | 64%      | 0.48                      |
| <b>Paralysis</b>                     | 5/155      | 3%       | 0.18                      |
| <b>Neurodegenerative disorder</b>    | 9/155      | 6%       | 0.24                      |
| <b>Chronic pulmonary disease</b>     | 44/155     | 28%      | 0.45                      |
| <b>Diabetes, uncomplicated</b>       | 35/155     | 23%      | 0.42                      |
| <b>Diabetes, complicated</b>         | 42/155     | 27%      | 0.45                      |
| <b>Hypothyroidism</b>                | 32/155     | 21%      | 0.41                      |

**Table 2. Number of Hospitalizations and Elixhauser comorbidity measures for CKD/MIT participants**

| <b>Comorbidities</b>                                   | <b>n/N</b> | <b>%</b> | <b>Standard Deviation</b> |
|--------------------------------------------------------|------------|----------|---------------------------|
| <b>Renal failure</b>                                   | 115/155    | 74%      | 0.44                      |
| <b>Liver disease</b>                                   | 10/155     | 6%       | 0.25                      |
| <b>Peptic ulcer disease, no bleeding</b>               | 0/155      | 0%       | 0.00                      |
| <b>AIDS/HIV</b>                                        | 0/155      | 0%       | 0.00                      |
| <b>Lymphoma</b>                                        | 1/155      | 1%       | 0.08                      |
| <b>Metastatic cancer</b>                               | 1/155      | 1%       | 0.08                      |
| <b>Solid tumor without metastasis</b>                  | 3/155      | 2%       | 0.14                      |
| <b>Rheumatoid arthritis/collagen vascular diseases</b> | 4/155      | 3%       | 0.16                      |
| <b>Coagulopathy</b>                                    | 4/155      | 3%       | 0.16                      |
| <b>Obesity</b>                                         | 45/155     | 29%      | 0.46                      |
| <b>Weight loss</b>                                     | 4/155      | 3%       | 0.16                      |
| <b>Fluid and electrolyte disorders</b>                 | 58/155     | 37%      | 0.49                      |
| <b>Blood loss anemia</b>                               | 1/155      | 1%       | 0.08                      |
| <b>Deficiency anemia</b>                               | 46/155     | 30%      | 0.46                      |
| <b>Alcohol abuse</b>                                   | 3/155      | 2%       | 0.14                      |



**Table 2. Number of Hospitalizations and Elixhauser comorbidity measures for CKD/MIT participants**

|                   |        |     |      |
|-------------------|--------|-----|------|
| <b>Drug abuse</b> | 2/155  | 1%  | 0.11 |
| <b>Psychosis</b>  | 1/155  | 1%  | 0.08 |
| <b>Depression</b> | 21/155 | 14% | 0.34 |
